# Supplementary material for: Prediction and optimization of epoxy adhesive strength from a small dataset through active learning
Source: PubMed Central journal article supplement (PMC6818118; doi:10.1080/14686996.2019.1673670), 2019-10-02
Supplement: TSTA_A_1673670_SM4906.pdf [file TSTA_A_1673670_SM4906.pdf]

# Supplemental material

## Prediction and optimization of epoxy adhesive strength from a small dataset through active learning

Sirawit Pruksawan<sup>a,b</sup>, Guillaume Lambard<sup>c\*</sup>, Sadaki Samitsu<sup>a</sup>, Keitaro Sodeyama<sup>c</sup> and Masanobu Naito<sup>a,b,d\*</sup>

*<sup>a</sup>Data-driven Polymer Design Group, Research and Services Division of Materials Data and Integrated System (MaDIS), National Institute for Materials Science (NIMS), Tsukuba, Japan; <sup>b</sup>Program in Materials Science and Engineering, Graduate School of Pure and Applied Sciences, University of Tsukuba, Tsukuba, Japan; <sup>c</sup>Energy Materials Design Group, Research and Services Division of Materials Data and Integrated System (MaDIS), National Institute for Materials Science (NIMS), Tsukuba, Japan; <sup>d</sup>Department of Advanced Materials Science, Graduate School of Frontier Sciences, The University of Tokyo, Kashiwa, Japan*

\* Corresponding author: [LAMBARD.Guillaume@nims.go.jp](mailto:LAMBARD.Guillaume@nims.go.jp),  
[NAITO.Masanobu@nims.go.jp](mailto:NAITO.Masanobu@nims.go.jp)

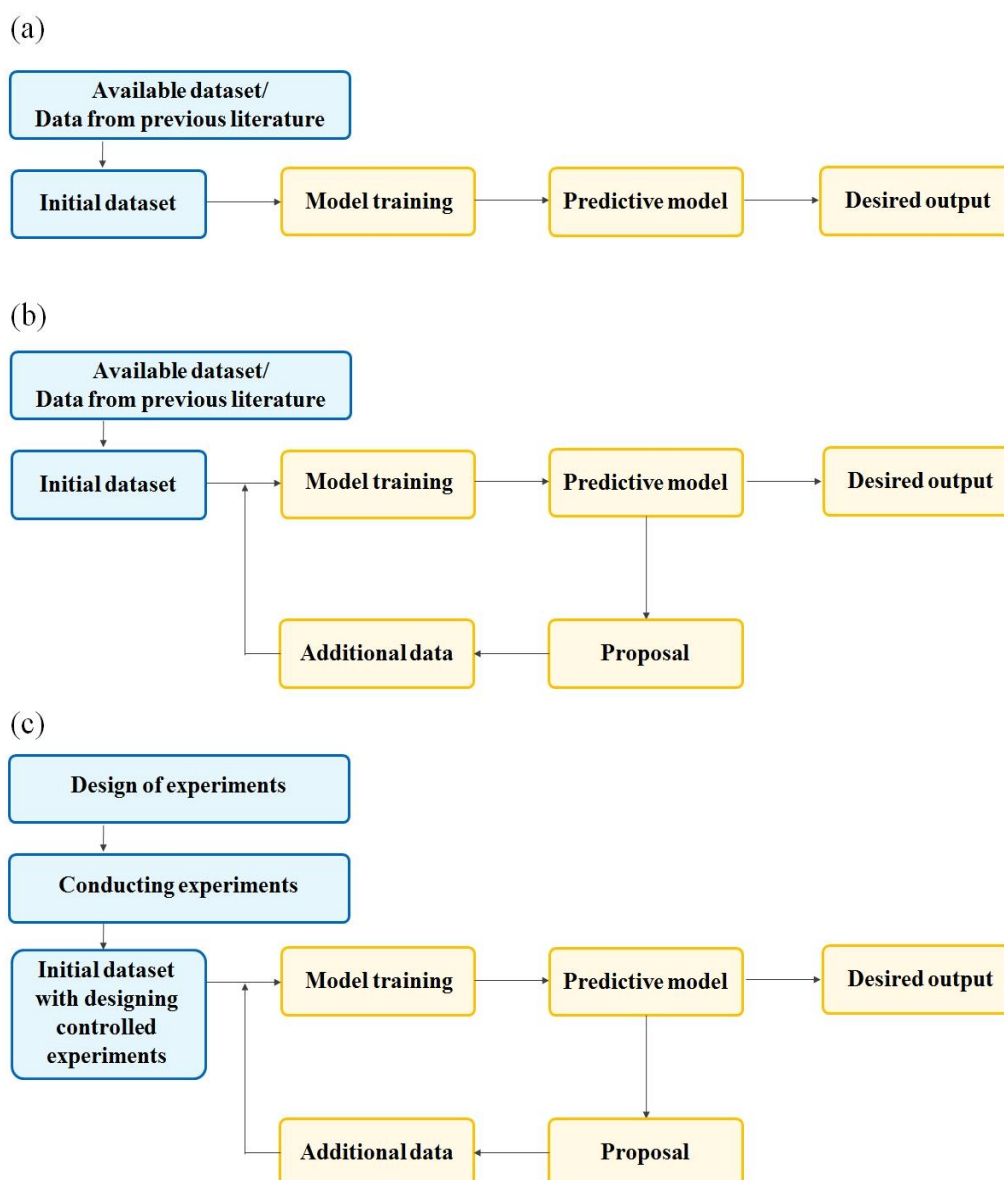

**Figure S1.** Typical workflow of a supervised machine learning task: (a) type A — conventional machine learning, (b) type B — active learning, (c) type C — active learning with designing controlled initial dataset.

Figure S1 shows three different types of supervised machine learning workflow: type A is the conventional machine learning, type B is active learning, and type C is our proposed approach — active learning with designing controlled initial dataset. In conventional machine learning (type A), an initial dataset collected from various sources

is used to train a predictive model, and the obtained model is applied for further prediction or optimization. Active learning (type B) is another strategy for machine learning in which the learning algorithm is fine-tuned by incorporating the new data point in its dataset. This type of iterative process is repeated cycle after cycle until a preliminary goal of a sufficiently high accuracy of the machine learning model is reached. The iterative process in active learning can improve the accuracy of the predictive model. In some case, an additional experimental data may be required to complete an initial dataset. Our proposed approach in this study (type C) is based on active learning; however, an initial dataset is constructed with designing controlled experiments and no any data from previous literature is required. Furthermore, the initial dataset obtained from experimental conditions suggested by design of experiment techniques allows us to attain a highly distributed dataset (Table S2), which is very beneficial for generating an accurate model.

**Table S1.** Summary of previous research work on machine learning-based experimental design in materials science. Workflow type refers to Figure S1.

| <b>Material</b>                          | <b>Target property</b>               | <b>Feature data</b>                                           | <b>Workflow type</b> | <b>Reference</b> |
|------------------------------------------|--------------------------------------|---------------------------------------------------------------|----------------------|------------------|
| BaTiO <sub>3</sub> -based piezoelectrics | Large electrostrains                 | Data from previous literatures                                | B                    | [1]              |
| Ferroelectric perovskites                | High ferroelectric Curie temperature | Data from previous literatures                                | B                    | [2]              |
| BaTiO <sub>3</sub> -based ceramics       | Large energy storage                 | Data from previous literatures                                | B                    | [3]              |
| NiTi-based shape memory alloys           | Low thermal hysteresis               | Data from previous literatures                                | B                    | [4]              |
| Metallic glasses                         | High glass-forming ability           | Data from previous literatures                                | B                    | [5]              |
| Epoxy adhesives                          | High adhesive joint strength         | Data from chemical product information and process parameters | C                    | Our study        |

**Table S2.** Experimental results of adhesive joint strength  $\sigma_{ad}$  (MPa) of samples prepared under various conditions (initial dataset, dataset size  $n_s = 32$  samples). Variable parameters include molecular weight of epoxy resin  $MW_E$  (g/mol), molecular weight of curing agent  $MW_C$  (g/mol) and amine-to-epoxide ratio  $r$  and curing temperature  $T_{cure}$  ( $^{\circ}C$ ).

| No | Variable parameter |                |      |                            | Measured $\sigma_{ad}$<br>(MPa) | Appearance feature of adhesives<br>(if any) |
|----|--------------------|----------------|------|----------------------------|---------------------------------|---------------------------------------------|
|    | $MW_E$ (g/mol)     | $MW_C$ (g/mol) | $r$  | $T_{cure}$ ( $^{\circ}C$ ) |                                 |                                             |
| 1  | 370                | 230            | 0.75 | 90                         | $8.3 \pm 1.8$                   | remaining uncured resin                     |
| 2  | 370                | 400            | 1.00 | 170                        | $28.8 \pm 0.7$                  |                                             |
| 3  | 370                | 2000           | 1.25 | 210                        | $1.5 \pm 0.1$                   | Soft                                        |
| 4  | 370                | 4000           | 1.50 | 130                        | $0.0 \pm 0.0$                   | soft; no adhesion to substrates             |
| 5  | 1650               | 230            | 1.00 | 130                        | $18.0 \pm 0.3$                  |                                             |
| 6  | 1650               | 400            | 0.75 | 210                        | $14.6 \pm 1.0$                  | orange-colored                              |
| 7  | 1650               | 2000           | 1.50 | 170                        | $3.3 \pm 0.7$                   | soft; sticky                                |
| 8  | 1650               | 4000           | 1.25 | 90                         | $2.0 \pm 0.1$                   | soft; remaining uncured resin               |
| 9  | 2900               | 230            | 1.25 | 170                        | $17.7 \pm 0.3$                  |                                             |
| 10 | 2900               | 400            | 1.50 | 90                         | $5.8 \pm 0.5$                   |                                             |
| 11 | 2900               | 2000           | 0.75 | 130                        | $5.7 \pm 0.3$                   |                                             |
| 12 | 2900               | 4000           | 1.00 | 210                        | $4.4 \pm 0.5$                   | soft; orange-colored                        |
| 13 | 3800               | 230            | 1.50 | 210                        | $15.3 \pm 2.5$                  | orange-colored                              |
| 14 | 3800               | 400            | 1.25 | 130                        | $10.4 \pm 0.1$                  |                                             |
| 15 | 3800               | 2000           | 1.00 | 90                         | $1.2 \pm 0.0$                   | non-uniform; sticky                         |
| 16 | 3800               | 4000           | 0.75 | 170                        | $4.0 \pm 0.1$                   |                                             |
| 17 | 370                | 230            | 1.50 | 130                        | $31.9 \pm 0.1$                  |                                             |
| 18 | 370                | 400            | 0.75 | 90                         | $2.8 \pm 1.5$                   | remaining uncured resin                     |
| 19 | 370                | 2000           | 1.00 | 170                        | $1.2 \pm 0.2$                   | soft; sticky                                |
| 20 | 370                | 4000           | 1.25 | 210                        | $0.6 \pm 0.0$                   | soft; no adhesion to substrates             |
| 21 | 1650               | 230            | 1.25 | 90                         | $9.9 \pm 0.7$                   |                                             |
| 22 | 1650               | 400            | 1.00 | 130                        | $18.9 \pm 0.8$                  |                                             |
| 23 | 1650               | 2000           | 0.75 | 210                        | $5.9 \pm 0.7$                   | soft; orange-colored                        |
| 24 | 1650               | 4000           | 1.50 | 170                        | $1.4 \pm 0.5$                   | soft; no adhesion to substrates             |
| 25 | 2900               | 230            | 1.00 | 210                        | $23.1 \pm 1.4$                  | orange-colored                              |
| 26 | 2900               | 400            | 1.25 | 170                        | $24.6 \pm 0.5$                  |                                             |
| 27 | 2900               | 2000           | 1.50 | 90                         | $4.4 \pm 0.1$                   | soft; remaining uncured resin               |
| 28 | 2900               | 4000           | 0.75 | 130                        | $2.0 \pm 0.6$                   |                                             |
| 29 | 3800               | 230            | 0.75 | 170                        | $15.5 \pm 0.2$                  |                                             |
| 30 | 3800               | 400            | 1.50 | 210                        | $28.9 \pm 0.6$                  | orange-colored                              |
| 31 | 3800               | 2000           | 1.25 | 130                        | $13.5 \pm 0.7$                  | soft; sticky                                |
| 32 | 3800               | 4000           | 1.00 | 90                         | $0.0 \pm 0.0$                   | soft; no adhesion to substrates             |

**Table S3.** Experimental results of adhesive joint strength  $\sigma_{ad}$  (MPa) of samples prepared by active learning proposals (15 samples). Variable parameters include molecular weight of epoxy resin  $MW_E$  (g/mol), molecular weight of curing agent  $MW_C$  (g/mol), amine-to-epoxide ratio  $r$  and curing temperature  $T_{cure}$  ( $^{\circ}C$ ).

| No | Variable parameter |                |      |                            | Measured $\sigma_{ad}$<br>(MPa) | Appearance feature of adhesives<br>(if any) |
|----|--------------------|----------------|------|----------------------------|---------------------------------|---------------------------------------------|
|    | $MW_E$ (g/mol)     | $MW_C$ (g/mol) | $r$  | $T_{cure}$ ( $^{\circ}C$ ) |                                 |                                             |
| 33 | 2900               | 400            | 1.00 | 210                        | $24.0 \pm 1.1$                  |                                             |
| 34 | 3800               | 400            | 1.00 | 210                        | $21.2 \pm 1.2$                  |                                             |
| 35 | 370                | 400            | 1.00 | 210                        | $29.0 \pm 0.1$                  | orange-colored                              |
| 36 | 1650               | 400            | 1.00 | 170                        | $22.4 \pm 1.7$                  |                                             |
| 37 | 1650               | 400            | 1.00 | 210                        | $27.3 \pm 1.6$                  |                                             |
| 38 | 370                | 400            | 1.25 | 210                        | $27.8 \pm 0.5$                  | dark-colored                                |
| 39 | 370                | 400            | 1.25 | 170                        | $28.3 \pm 0.9$                  |                                             |
| 40 | 370                | 400            | 1.50 | 210                        | $23.1 \pm 0.4$                  | dark-colored                                |
| 41 | 370                | 400            | 1.50 | 170                        | $22.4 \pm 1.8$                  |                                             |
| 42 | 1650               | 400            | 1.25 | 210                        | $24.6 \pm 0.0$                  | orange-colored                              |
| 43 | 2900               | 400            | 1.00 | 170                        | $20.5 \pm 3.5$                  |                                             |
| 44 | 370                | 230            | 1.00 | 210                        | $24.6 \pm 2.0$                  | dark-colored                                |
| 45 | 370                | 230            | 1.00 | 170                        | $27.9 \pm 0.2$                  |                                             |
| 46 | 1650               | 400            | 1.25 | 170                        | $23.5 \pm 1.0$                  |                                             |
| 47 | 2900               | 400            | 1.25 | 210                        | $25.7 \pm 0.9$                  | orange-colored                              |

**Table S4.** Hyperparameters used for ML models. Default values of hyperparameters are used if no value is specified.

| Model                              | Hyperparameter                                      |
|------------------------------------|-----------------------------------------------------|
| Figure 5a                          | max_depth = 5, gamma = 3.3                          |
| Figure 5b                          | max_depth = 3, n_estimators = 100, random_state = 2 |
| Figure 5c                          | alpha = 0.1                                         |
| Table 2/Figure 6 – initial dataset | max_depth = 5, gamma = 3.30, learning_rate = 0.1    |
| Table 2/Figure 6 – cycle 1         | max_depth = 4, gamma = 2.70, learning_rate = 0.1    |
| Table 2/Figure 6 – cycle 2         | max_depth = 4, gamma = 1.80, learning_rate = 0.1    |
| Table 2/Figure 6 – cycle 3         | max_depth = 4, gamma = 2.86, learning_rate = 0.4    |

## References

1. Yuan R LZ, Balachandran PV, Xue D, Zhou Y, Ding X, Sun J, Xue D, Lookman T. Accelerated Discovery of Large Electrostrains in BaTiO<sub>3</sub>-based Piezoelectrics using Active Learning. *Adv Mater.* 30(7):1702884.
2. Balachandran PV, Kowalski B, Sehirlioglu A, et al. Experimental Search for High-temperature Ferroelectric Perovskites Guided by Two-step Machine Learning. *Nat Commun.* 2018;9:1668.
3. Yuan R, Tian Y, Xue D, et al. Accelerated Search for BaTiO<sub>3</sub>-based Ceramics with Large Energy Storage at Low Fields using Machine Learning and Experimental Design. *Adv Sci.* 2019:1901395.
4. Xue D, Balachandran PV, Hogden J, et al. Accelerated Search for Materials with Targeted Properties by Adaptive Design. *Nat Commun.* 2016;7:11241.
5. Ren F, Ward L, Williams T, et al. Accelerated Discovery of Metallic Glasses through Iteration of Machine Learning and High-throughput Experiments. *Sci Adv.* 2018;4(4):eaq1566.
